# Supplementary material
Source: PubMed Central journal article supplement (PMC6446710)
Supplement: 10.1194_M088880_jlr.M088880-1.pdf [file 10.1194_M088880_jlr.M088880-1.pdf]

## **Supplementary Information**

### **Repression of hepatocyte nuclear factor 4 alpha by AP-1 underlies dyslipidemia associated with retinoic acid**

Kyoung-Jae Won, Joo-Seop Park, and Hyunyoung Jeong

833 S. Wood Street, Department of Pharmacy Practice (K.-J.W. and H.J.), Department of Biopharmaceutical Sciences (H. J.), College of Pharmacy, University of Illinois at Chicago

Division of Pediatric Urology, Division of Developmental Biology, Cincinnati Children's Hospital Medical Center (J.-S.P.)

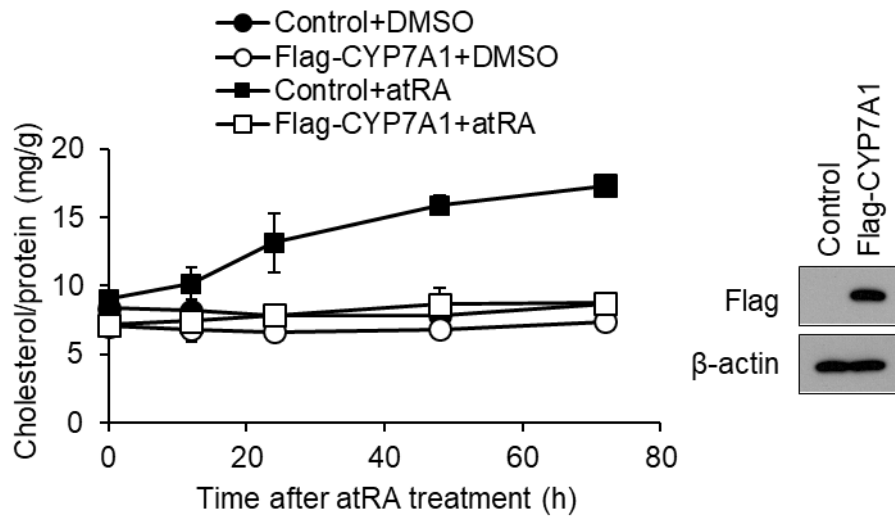

**Supplemental Figure S1.** *CYP7A1* overexpression abrogates atRA-induced cholesterol accumulation. Human hepatocytes overexpressing Flag-CYP7A1 were treated with atRA (1  $\mu$ M) or DMSO for the time periods indicated, and cholesterol levels were measured. CYP7A1 overexpression was verified by western blot analysis.

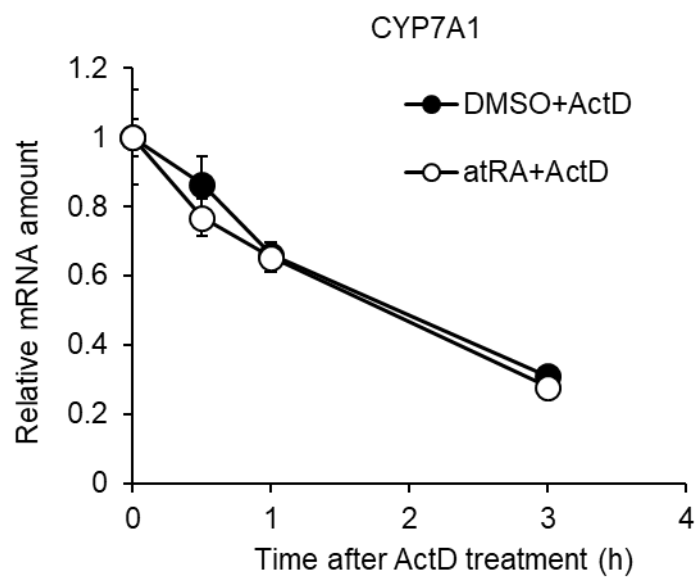

**Supplemental Figure S2.** *CYP7A1* mRNA stability is not affected by atRA. HepaRG cells were pretreated with atRA or DMSO for 1 h and treated with actinomycin D (ActD, 2  $\mu$ g/ml) for 3 h. mRNA levels were determined by qPCR (n=3, mean $\pm$ S.D.).

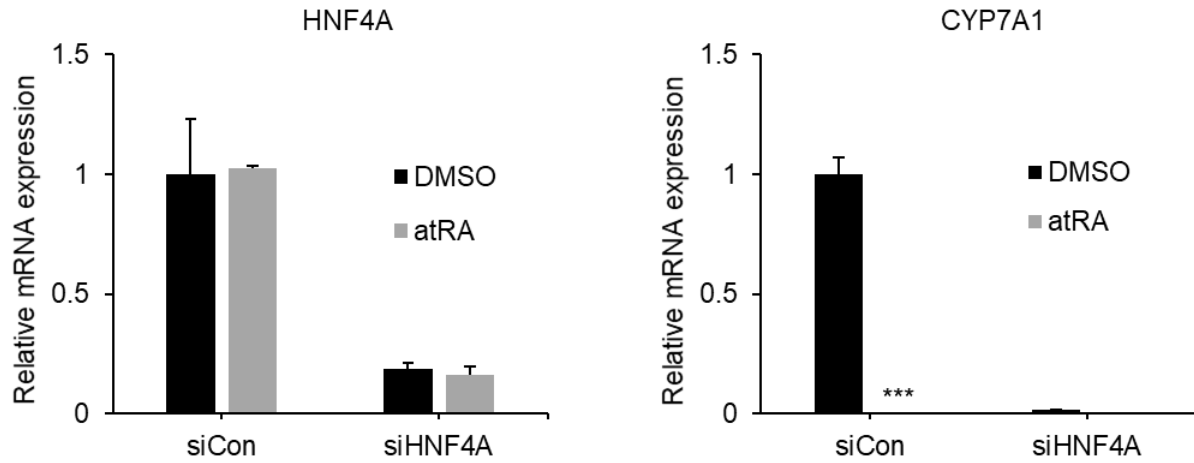

**Supplemental Figure S3.** HNF4 $\alpha$  is a critical component in atRA-induced *CYP7A1* repression. Human hepatocytes were transfected with siRNA (50 nM) targeting *HNF4A* (siHNF4A) or control siRNA (siCon) for 48 h and treated with atRA (1  $\mu$ M) or DMSO for 3 h. mRNA levels were determined by qPCR (n=3, mean $\pm$ S.D.). \*\*\*, p<0.001 vs DMSO-treated group.

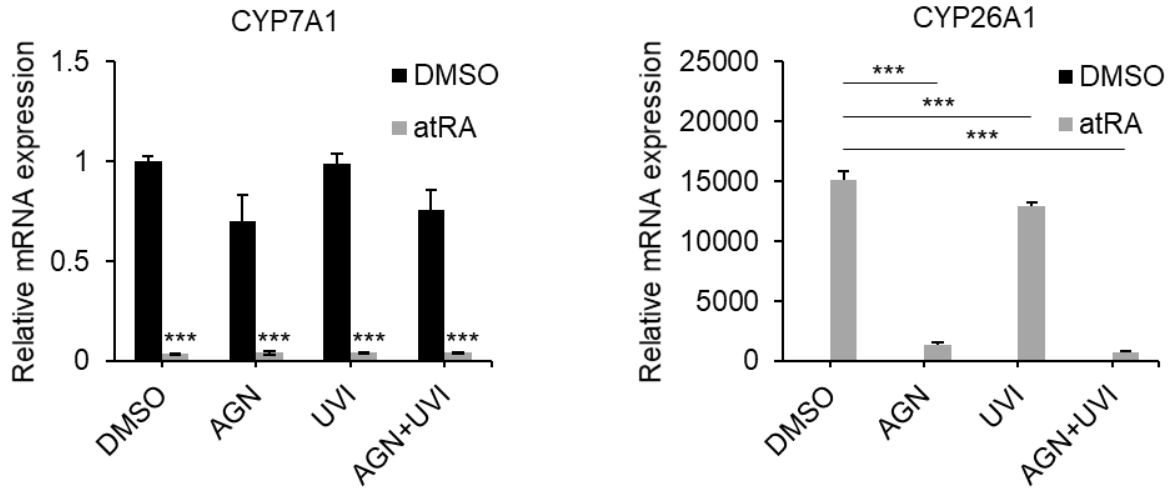

**Supplemental Figure S4.** RAR/RXR activation does not play a role in CYP7A1 repression. HepaRG cells were pretreated with AGN193109 (an RAR antagonist; 1  $\mu$ M) and/or UVI3003 (an RXR antagonist; 10  $\mu$ M) and treated with atRA (1  $\mu$ M) for 3 h. mRNA levels were determined by qPCR (n=3, mean $\pm$ S.D). \*\*\*, p<0.001.

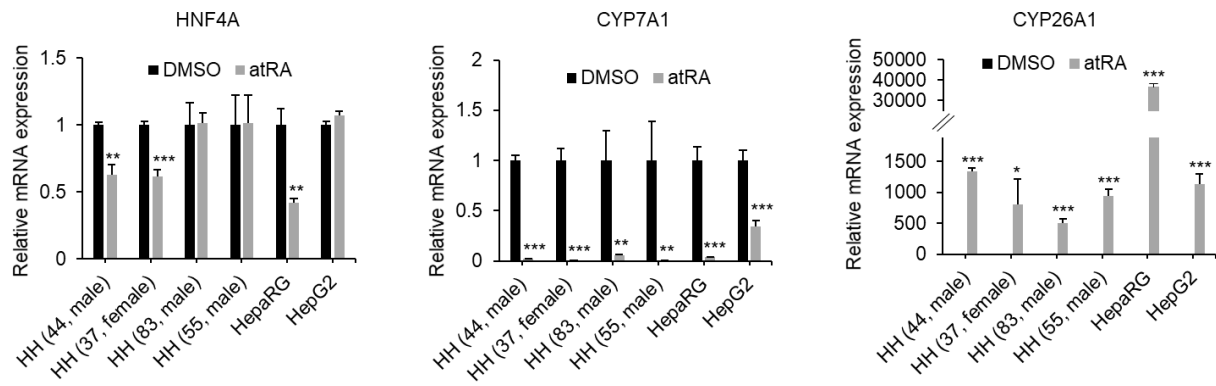

**Supplemental Figure S5.** *HNF4A* expression is not repressed in all atRA-treated cells. Human hepatocytes (HH), HepaRG, HepG2 cells were treated with atRA (1  $\mu$ M) or DMSO for 6 h. *HNF4A* mRNA levels were determined by qPCR (n=3, mean $\pm$ S.D.). \*\*, p<0.01; \*\*\*, p<0.001 vs DMSO-treated group.

A

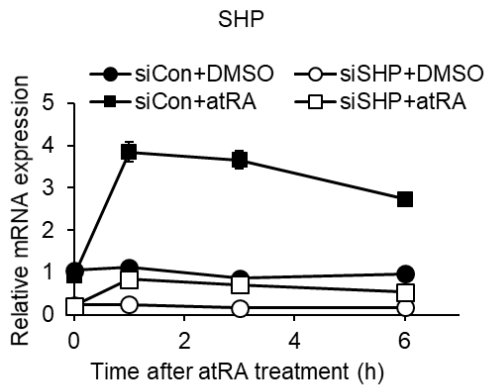

B

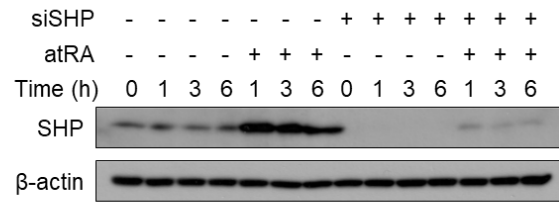

C

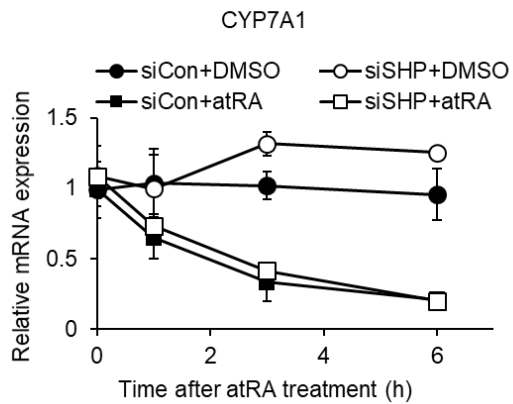

**Supplemental Figure S6.** atRA-induced SHP does not contribute to suppression of *CYP7A1*. Human hepatocytes were transfected with siRNA (50 nM) targeting *SHP* (siSHP) or control siRNA (siCon), followed by treatment with atRA (1  $\mu$ M) or DMSO for the time periods indicated. mRNA and protein levels were determined by qPCR (n=3, mean $\pm$ S.D.) (A, C) and western blot analysis (B), respectively.

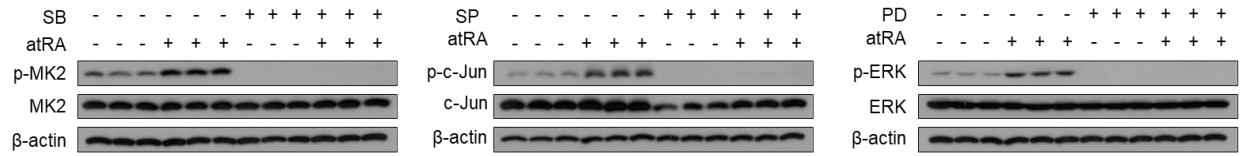

**Supplemental Figure S7.** Pharmacological inhibition of MAPK pathways. HepaRG cells were pretreated with SB203580 (SB, 50  $\mu$ M), SP600125 (SP, 50  $\mu$ M), or PD98059 (PD, 50  $\mu$ M) for 1 h and treated with atRA (1  $\mu$ M) for 3 h. Phosphorylation of downstream effector or signaling proteins (i.e., MK2 for p38, c-Jun for JNK, and ERK for ERK pathways) was detected by western blot analysis.



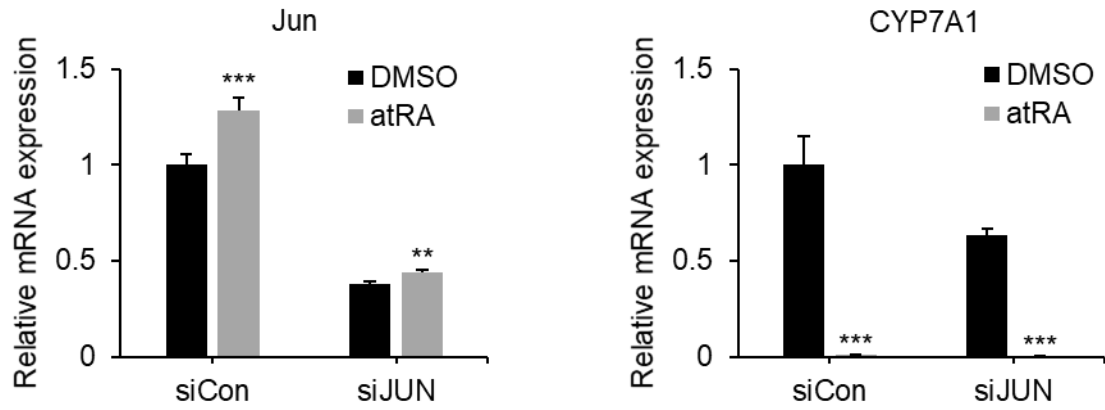

**Supplemental Figure S8.** atRA-mediated *CYP7A1* repression is maintained in *JUN* knocked-down cells . HepaRG cells were transfected with siRNA (50 nM) targeting *JUN* (siJUN) or control siRNA (siCon) for 48 h and treated with atRA (1  $\mu$ M) or DMSO for 3 h. mRNA levels were determined by qPCR (n=3, mean $\pm$ S.D.). \*\*, p<0.01; \*\*\*, p<0.001 vs DMSO-treated group.

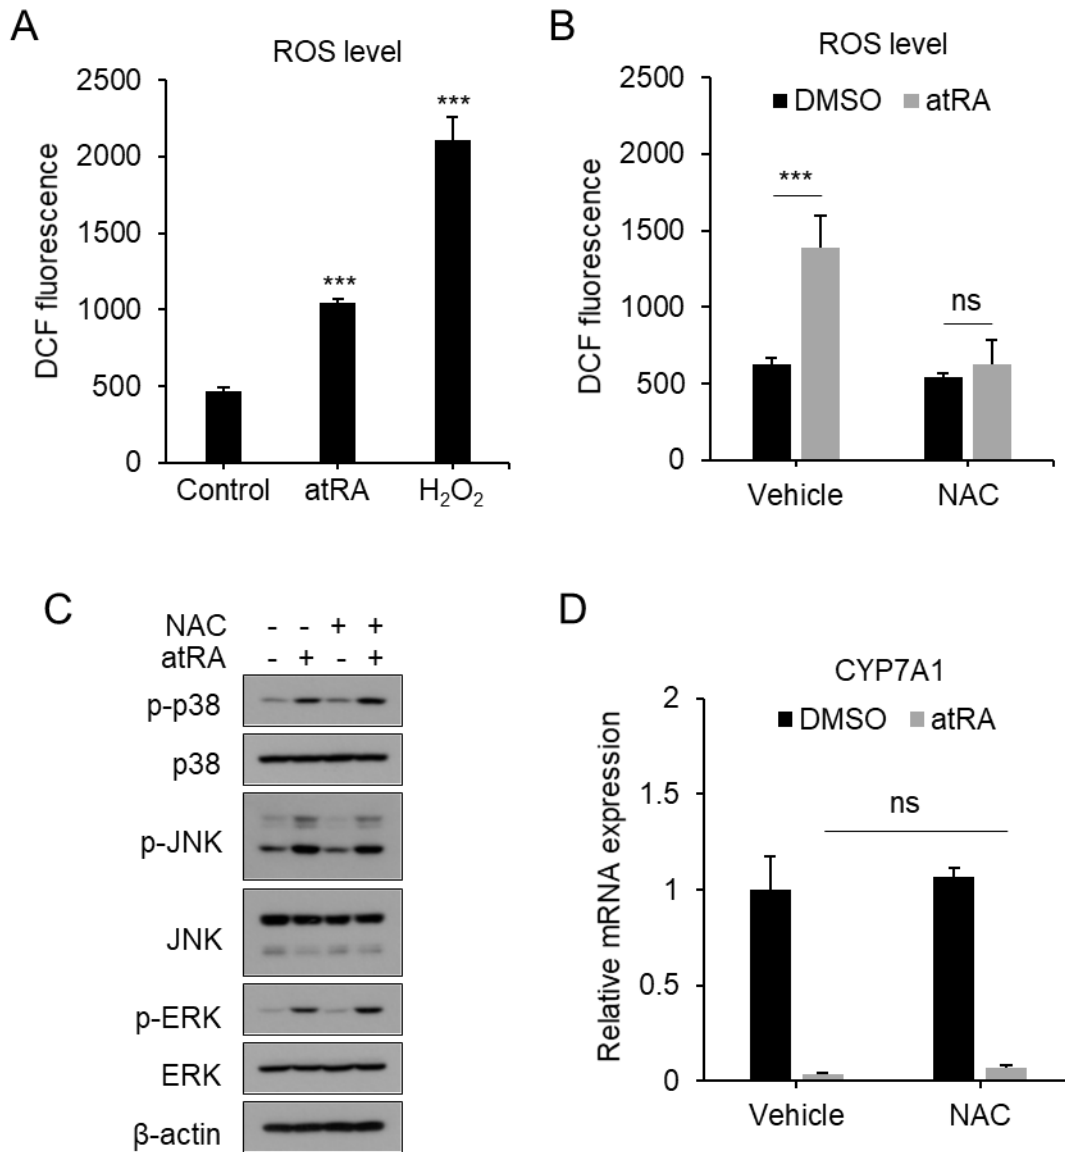

**Supplemental Figure S9.** atRA-mediated MAPK activation is ROS-independent. (A) HepaRG cells were treated with atRA (1  $\mu$ M) or H<sub>2</sub>O<sub>2</sub> (1 mM) for 1 h, followed by 2',7'-dichlorofluorescein diacetate (DCFDA) treatment (25  $\mu$ M) for 15 min. H<sub>2</sub>O<sub>2</sub> was used as a positive control. Fluorescence levels were measured at 495/525 nm (n=6, mean $\pm$ S.D.) \*\*\*, p<0.001 vs control group. (B-D) HepaRG cells were pretreated with N-acetylcysteine (NAC, 400  $\mu$ M; a ROS inhibitor) for 1 h, and treated with atRA (1  $\mu$ M) for 3 h. DCFDA (25  $\mu$ M) was treated for 15 min, and fluorescence levels (B) were measured at 495/525 nm (n=6, mean $\pm$ S.D.) \*\*\*, p<0.001 vs vehicle group; ns, not significant. Protein and mRNA levels were determined by western blot analysis (C) and qPCR (D) (n=3, mean $\pm$ S.D.), respectively. ns, not significant.

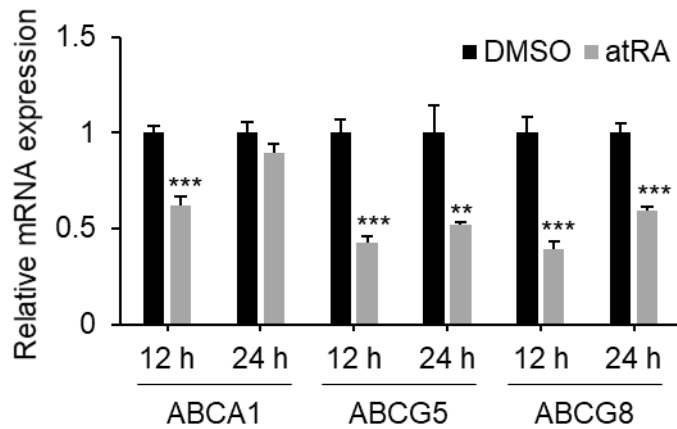

**Supplemental Figure S10. Altered expression of cholesterol transporters by atRA treatment.** HepaRG cells were treated with atRA (1  $\mu$ M) or DMSO for 24 h. ABCA1, ABCG5, and ABCG8 mRNA levels were determined by qPCR (n=3, mean $\pm$ S.D.). \*\*, p<0.01; \*\*\*, p<0.001 vs DMSO-treated group.
